# Supplementary material for: Operational calibration of a fully polarimetric radiometer for stratospheric temperature retrievals
Source: Copernicus journal article supplement (doi:10.5194/egusphere-2025-2561), 2025-09-16

TEMPERA-C, 25-Mar-2024 00:15:32 - 25-Mar-2024 00:45:32

measurement of O<sub>2</sub> fine structure emission lines

line-center at 53.07GHz

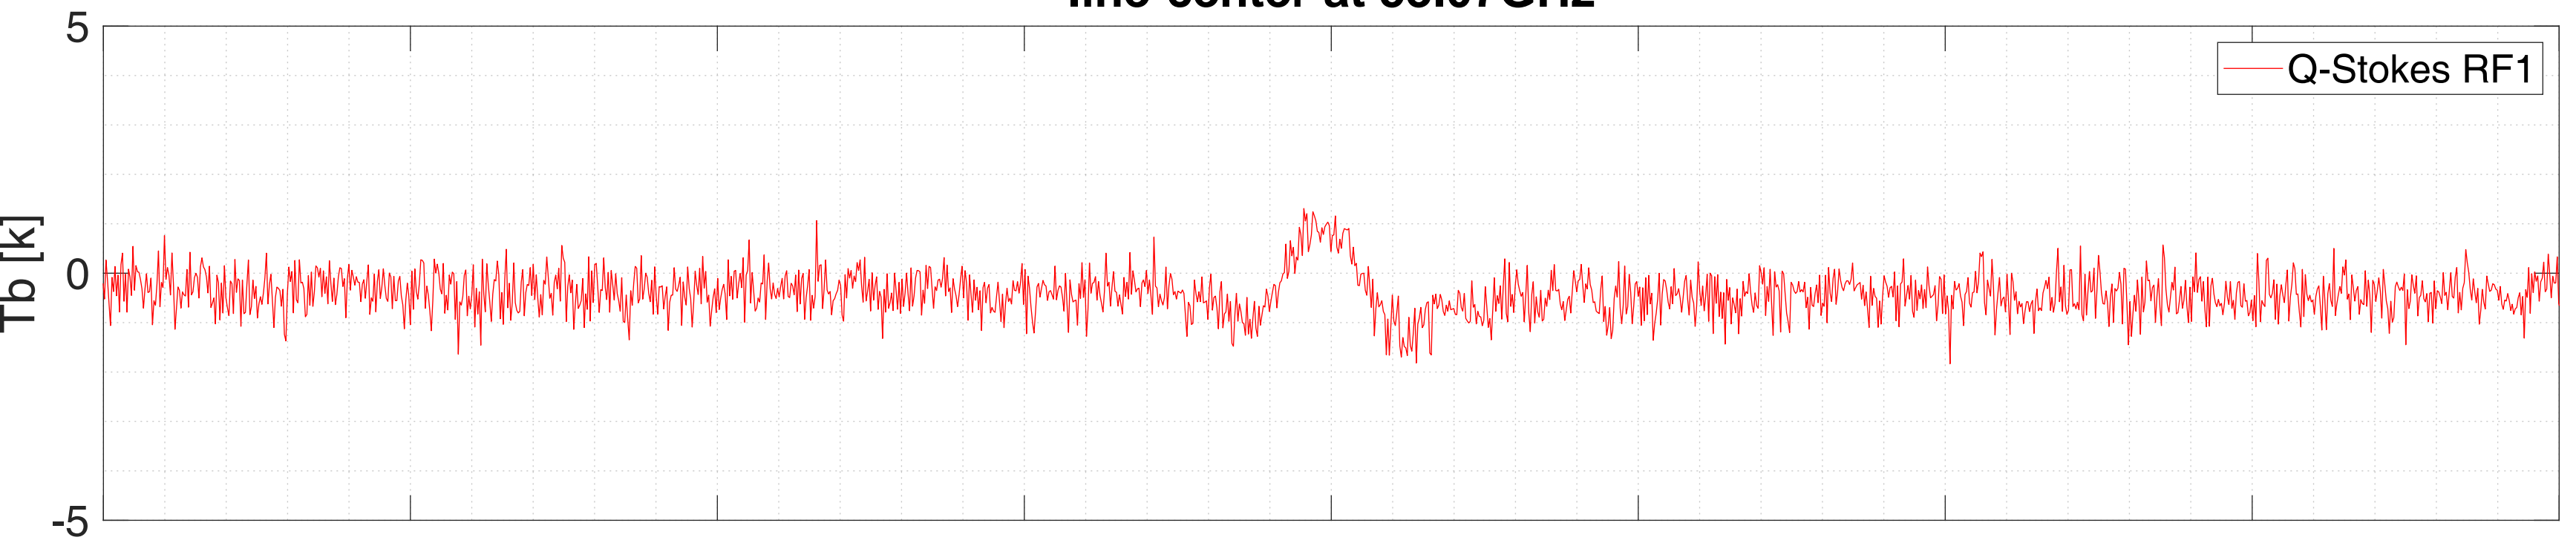

line-center at 53.6GHz

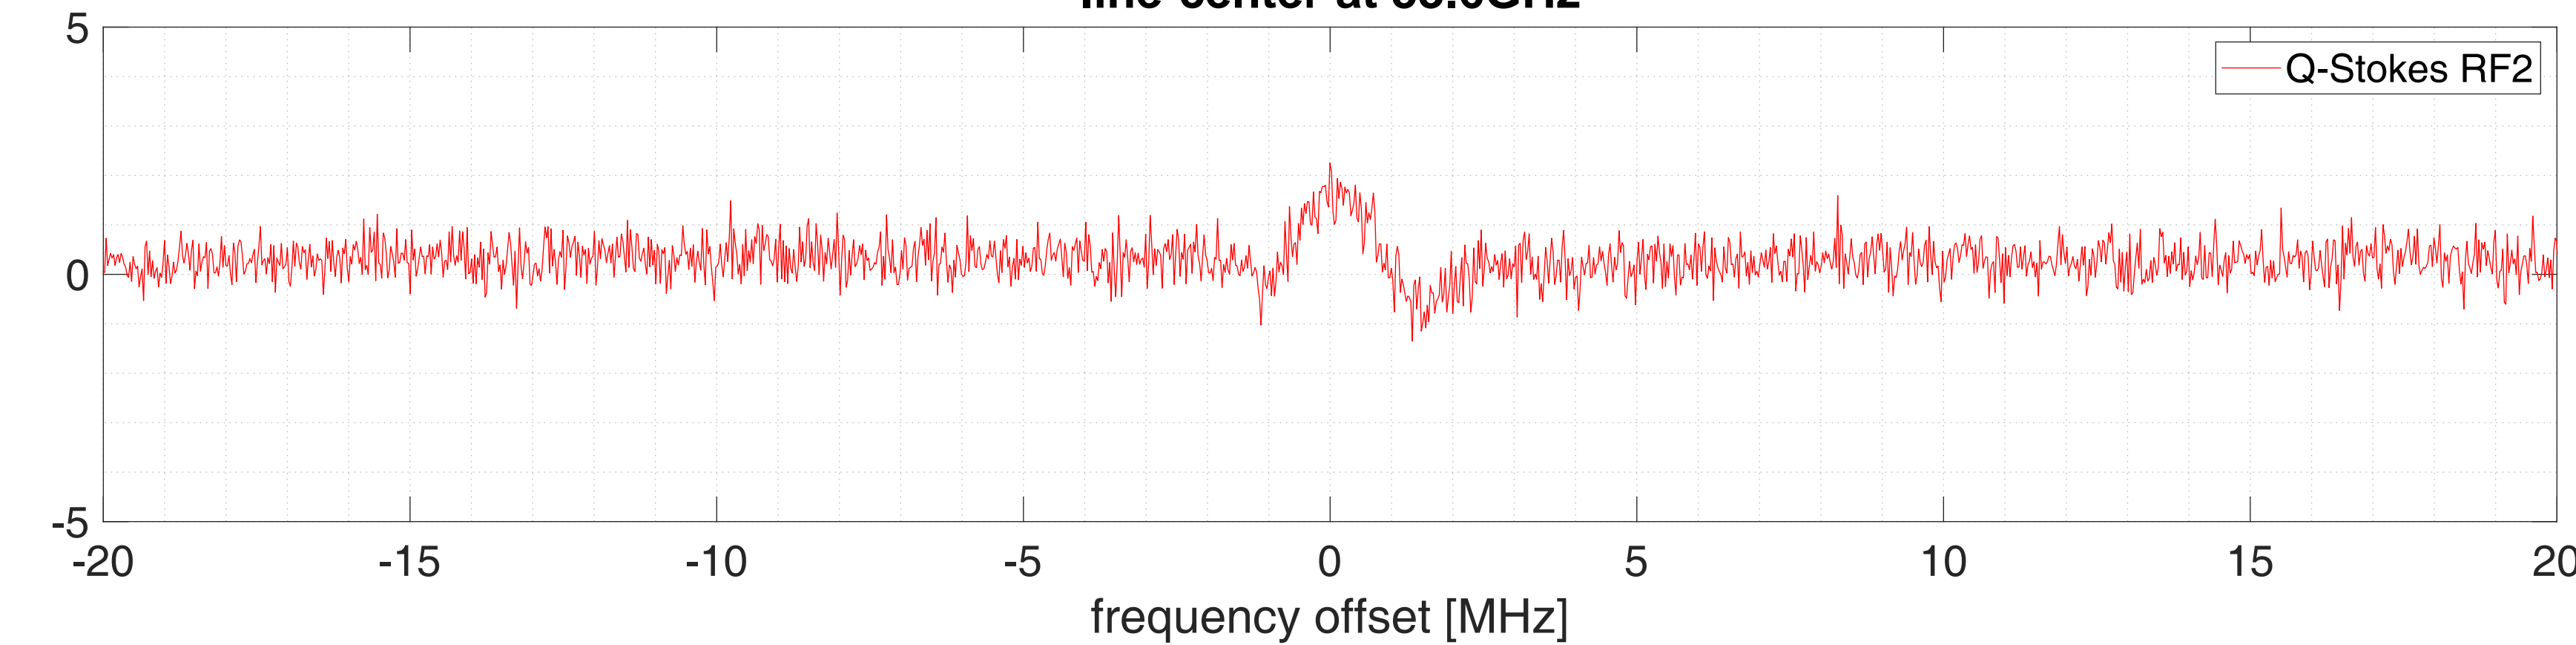

Supplement: Supplementary file [file egusphere-2025-2561-AC1-supplement.pdf]
